# Supplementary material for: Enhanced Enzyme Reuse through the Bioconjugation of L-Asparaginase and Silica-Based Supported Ionic Liquid-like Phase Materials
Source: MDPI journal article supplement (doi:10.3390/molecules27030929), 2022-01-29
Supplement: s1 [file s1]

## **Supplementary Materials**

# **Enhanced enzyme reuse through the bioconjugation of L-asparaginase and silica-based supported ionic-liquid like phase materials**

**João C. F. Nunes <sup>1</sup>, Mafalda R. Almeida <sup>1</sup>, Rui M. F. Bento <sup>1</sup>, Matheus M.  
Pereira <sup>1</sup>, Valéria C. Santos-Ebinuma <sup>2</sup>, Márcia C. Neves <sup>1</sup>, Mara G. Freire <sup>1</sup> and  
Ana P. M. Tavares <sup>1,\*</sup>**

*<sup>1</sup> CICECO-Aveiro Institute of Materials, Department of Chemistry, University of  
Aveiro, 3810-193 Aveiro, Portugal;*

*<sup>2</sup> Department of Engineering of Bioprocesses and Biotechnology, School of  
Pharmaceutical Sciences, São Paulo State University (UNESP), Araraquara 14800-  
903, Brazil.*

---

*\* Correspondence: [aptavares@ua.pt](mailto:aptavares@ua.pt) (A.P.M.T.)*

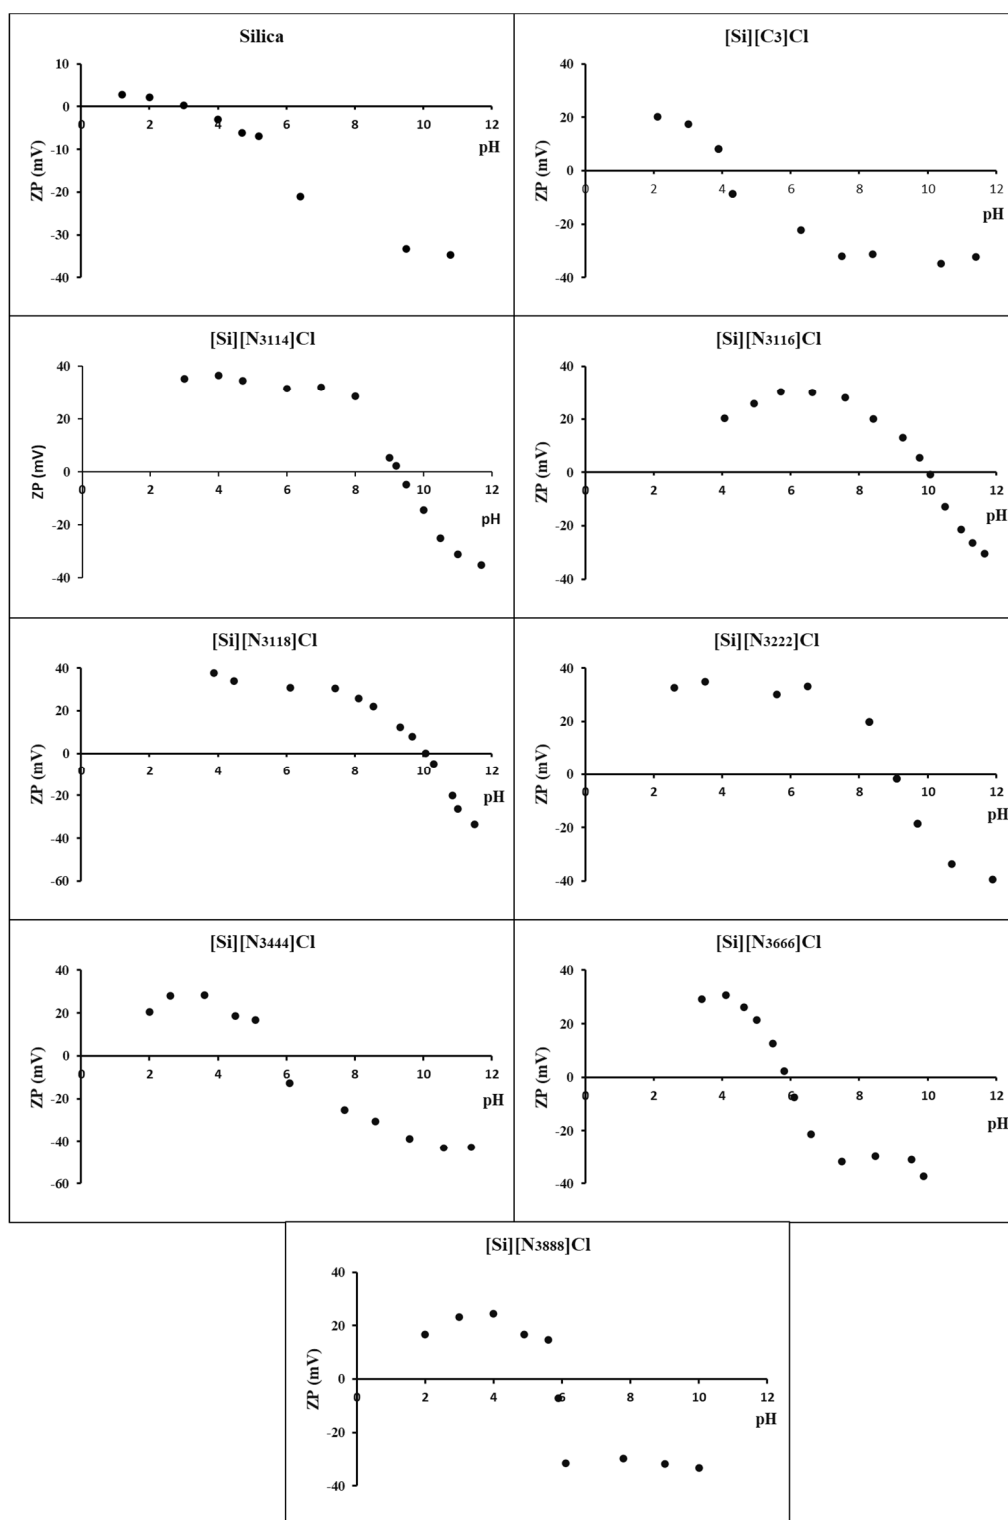

**Figure S1.** Zeta potential (ZP) of silica, [Si][C<sub>3</sub>]Cl and all SSILLP materials ([Si][N<sub>3114</sub>]Cl, [Si][N<sub>3116</sub>]Cl, [Si][N<sub>3118</sub>]Cl, [Si][N<sub>3222</sub>]Cl, [Si][N<sub>3444</sub>]Cl, [Si][N<sub>3666</sub>]Cl and [Si][N<sub>3888</sub>]Cl) as a function of pH.

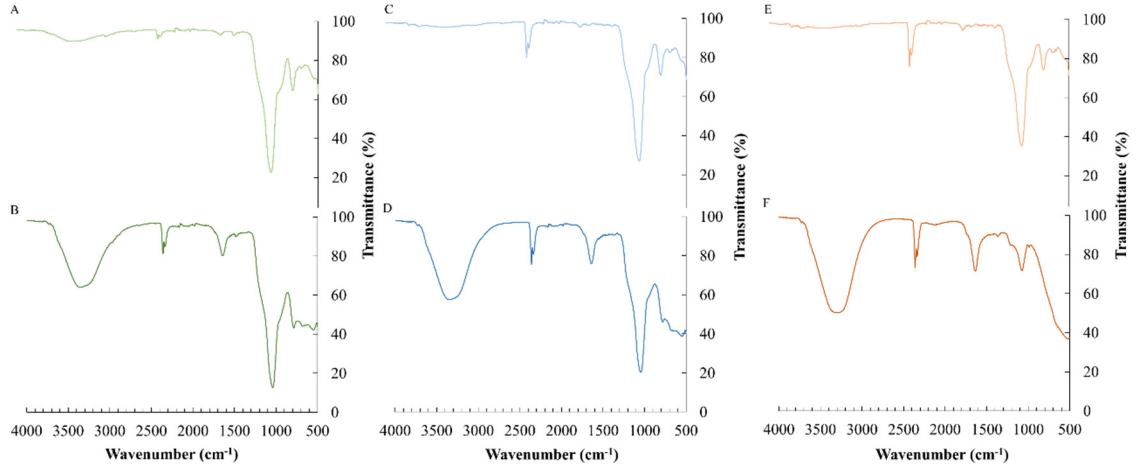

**Figure S2.** Attenuated total reflectance - Fourier-transform infrared (ATR-FTIR) spectra of [Si][N<sub>3114</sub>]Cl (A), ASNase-[Si][N<sub>3114</sub>]Cl (B), [Si][N<sub>3222</sub>]Cl (C), ASNase-[Si][N<sub>3222</sub>]Cl (D), [Si][N<sub>3888</sub>]Cl (E), and ASNase-[Si][N<sub>3888</sub>]Cl (F).

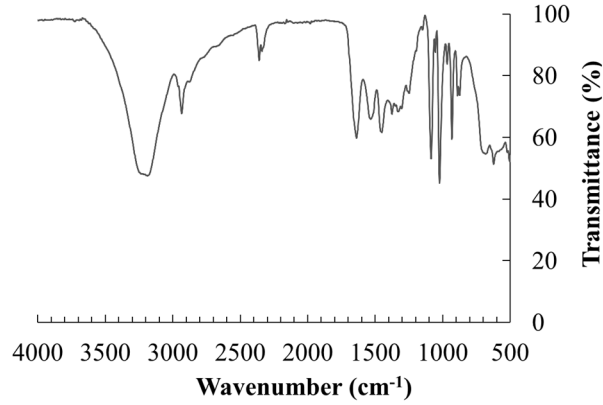

**Figure S3.** ATR-FTIR spectrum of the commercial ASNase from *E. coli* used in this work.

The relative recovered activity of immobilized ASNase ( $RRA_{IA}$ ) (%) onto the SSILLP materials was assessed using the following conditions: constant ASNase concentration ( $6 \times 10^{-2}$  mg mL<sup>-1</sup>), volume of the Nessler reaction ( $V_N$ : 2.5 mL), volume of the stopped reaction sample ( $V_s$ : 0.1 mL), reaction time ( $R_T$ : 30 min) and was determined according to Eq. S1:

$$RRA_{IA} = \frac{A_{IA}}{MA_{FA}} \times 100 \quad (S1)$$

where  $A_{IA}$  (U mg<sup>-1</sup>) is the activity of the effectively immobilized enzyme and  $MA_{FA}$  (U mg<sup>-1</sup>) is the maximum theoretical activity that would exist if the free enzyme was totally immobilized (U mg<sup>-1</sup>) determined according to Eqs. S2 and S3:

$$A_{IA} = \frac{NH_4^+ \times V_R}{M_M} \quad (S2)$$

$$MA_{FA} = \frac{NH_4^+ \times d_f}{M_M} \quad (S3)$$

where  $NH_4^+$  is the ammonium concentration produced in the enzymatic reaction ( $\mu$ mol mL<sup>-1</sup>),  $V_R$  is the volume of enzymatic reaction (1 mL),  $M_M$  is the mass of the SSILLP materials (10 mg) and  $d_f$  is the dilution factor.

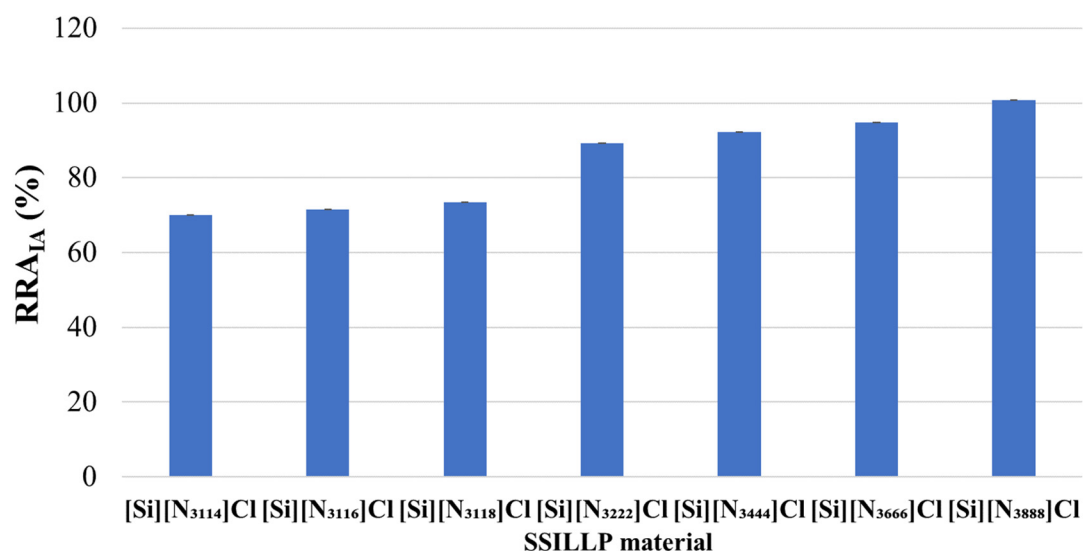

**Figure S4.** Relative recovered activity of immobilized ASNase (RRA<sub>IA</sub>) on the supports: [Si][N<sub>3114</sub>]Cl, [Si][N<sub>3116</sub>]Cl, [Si][N<sub>3118</sub>]Cl, [Si][N<sub>3222</sub>]Cl, [Si][N<sub>3444</sub>]Cl, [Si][N<sub>3666</sub>]Cl and [Si][N<sub>3888</sub>]Cl under optimized assay conditions (pH 8,  $6 \times 10^{-3}$  mg mg<sup>-1</sup> of ASNase and 60 min). Error bars correspond to standard deviation.

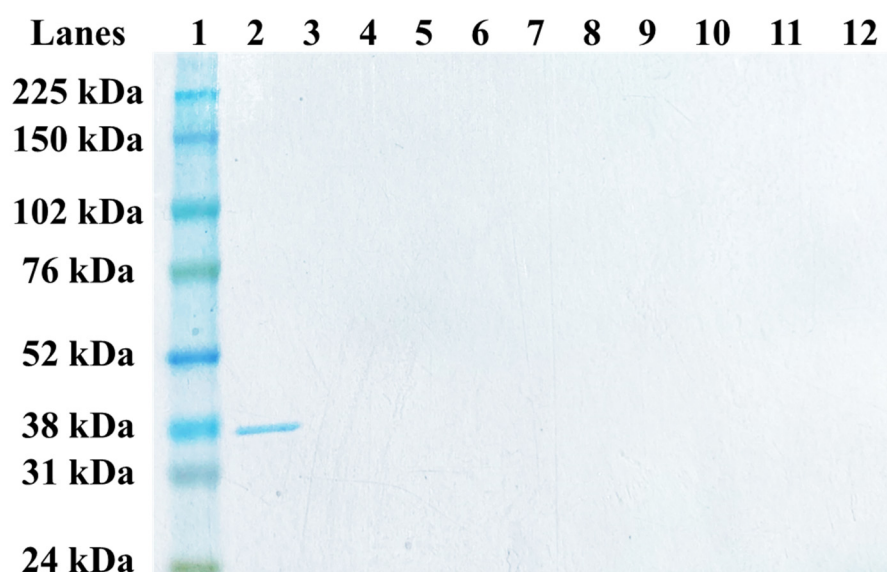

**Figure S5.** SDS-Page of the supernatants of the assays performed in the operational stability studies (5 cycles of reaction) for the SSILLP materials [Si][N<sub>3888</sub>]Cl and [Si][N<sub>3114</sub>]Cl; lane 1: Full-Range Rainbow Molecular Weight Marker by Cytiva (protein molecular weight marker), lane 2: 0.06 mg mL<sup>-1</sup> of ASNase, lanes 3, 4, 5, 6, and 7: cycles 1, 2, 3, 4, and 5 of [Si][N<sub>3888</sub>]Cl, lanes 8, 9, 10, 11, 12: cycles 1, 2, 3, 4, and 5 of [Si][N<sub>3114</sub>]Cl.
